# Supplementary material for: Black Perinatal Mental Health: Prioritizing Maternal Mental Health to Optimize Infant Health and Wellness
Source: PubMed Central journal article supplement (PMC9098970; doi:10.3389/fpsyt.2022.807235), 2022-04-29
Supplement: Table_2.pdf [file Table_2.pdf]

**Table S2. Pathways to Equitable and Anti-Racist Maternal and Infant Mental Health Care**

| <b>Participant Pseudonym</b> | <b>Training and Expertise</b>                                                                                 |
|------------------------------|---------------------------------------------------------------------------------------------------------------|
| Monica                       | Perinatal social worker                                                                                       |
| Felicia                      | Licensed clinical psychologist; birth doula                                                                   |
| Alesia                       | Health disparities researcher                                                                                 |
| Yolanda                      | Licensed clinical psychologist                                                                                |
| Michelle                     | Licensed mental health therapist                                                                              |
| Morgan                       | Licensed mental health therapist                                                                              |
| Cassandra                    | Licensed marriage and family therapist ( <i>specializing in maternal health and maternal-infant bonding</i> ) |
| Yvette                       | Birth and postpartum doula                                                                                    |
| Annette                      | Licensed clinical professional counselor                                                                      |
| Tayler                       | Certified breastfeeding specialist; parenting support coach                                                   |
